# Supplementary material
Source: PubMed Central journal article supplement (PMC1914161)
Supplement: plntphys_pp.107.097063_1.pdf [file plntphys_pp.107.097063_1.pdf]

### Supplemental materials

Lists of sucrose synthase alleles and the nucleotide and predicted amino acid sequence changes compared with the WT

**Table S1.** *Lotus japonicus* *SUS1* alleles and their sequence differences compared with the wild type

| SL Plant Number | Allele number  | Nucleotide change | Effect |
|-----------------|----------------|-------------------|--------|
| 1861-1          | n/a            | C329T             | INTRON |
| 3456-1          | <i>sus1-6</i>  | C463T             | A87V   |
| 1437-1          | <i>sus1-2</i>  | G815A             | G154E  |
| 3365-1          | <i>sus1-7</i>  | C1296T            | P220L  |
| 4106-1          | n/a            | G1345A            | L236=  |
| 2035-1          | <i>sus1-8</i>  | G1346A            | E237K  |
| 427-1           | <i>sus1-9</i>  | C1424T            | P263S  |
| 1130-1          | <i>sus1-10</i> | G1449A            | G271E  |
| 4194-1          | n/a            | C1585T            | INTRON |
| 6-1             | n/a            | C1598T            | INTRON |
| 322-1/2721-1    | <i>sus1-3</i>  | G1653A            | D308N  |
| 266-1           | <i>sus1-11</i> | C1689T            | R320C  |
| 967-2           | n/a            | G1749A            | INTRON |
| 937-1           | n/a            | G1787A            | INTRON |
| 136-1           | n/a            | C1836T            | INTRON |
| 2109-1          | <i>sus1-4</i>  | C1854T            | P340S  |
| 1123-1          | <i>sus1-5</i>  | G1863A            | V343M  |
| 1974-1          | n/a            | G1892A            | E352=  |
| 122-2           | <i>sus1-12</i> | G1944A            | E370K  |
| 3337-1/1177-1   | <i>sus1-13</i> | G1951A            | G372E  |
| 649-1           | <i>sus1-1</i>  | G1988A            | W384*  |

---

|            |                |        |        |
|------------|----------------|--------|--------|
| 1496-1     | <i>sus1-14</i> | C1990T | P385L  |
| 3055-1/2/3 | n/a            | G2000A | E388=  |
| 1966-3     | <i>sus1-15</i> | C2108T | T396I  |
| 3465-1     | n/a            | T2478C | INTRON |
| 1392-1     | n/a            | C2512T | INTRON |
| 1729-1     | n/a            | C2547T | INTRON |
| 2723-1     | <i>sus1-16</i> | G2676A | G525E  |
| 1197-1     | n/a            | C2830T | INTRON |
| 283-1      | n/a            | C2991T | D580=  |
| 1882-1     | n/a            | C3375T | Y708=  |
| 820-3      | <i>sus1-17</i> | C3443T | A731G  |
| 693-1      | n/a            | C3609T | INTRON |
| 1484-1     | n/a            | C3862T | INTRON |

---

**Table S2.** *Lotus japonicus* *SUS2* alleles and their sequence differences compared with the wild type

| SL Plant Number   | Allele number | Nucleotide change | Effect |
|-------------------|---------------|-------------------|--------|
| 1567-1            | <i>sus2-1</i> | G911A             | E112K  |
| 170-1             | <i>sus2-2</i> | G956A             | V127I  |
| 1955-1/<br>1967-1 | n/a           | C1185T            | N165=  |
| 1554-1            | <i>sus2-3</i> | G1267A            | G193S  |
| 4341-1            | <i>n/a</i>    | G1314A            | INTRON |
| 1710-1            | <i>sus2-4</i> | G2314A            | V339I  |
| 1037-2/<br>4947-1 | n/a           | C2398T            | L367=  |
| 1467-1            | <i>sus2-5</i> | C2465T            | P389L  |
| 1664-1            | n/a           | C2648T            | INTRON |
| 642-1             | <i>sus2-6</i> | C2765T            | S425F  |
| 1568-1            | n/a           | C2809T            | INTRON |

**Table S3.** *Lotus japonicus* *SUS3* alleles and their sequence differences compared with the wild type

| SL Plant Number | Allele number | Nucleotide change | Effect |
|-----------------|---------------|-------------------|--------|
| 338-1           | <i>sus3-2</i> | G1605A            | G240S  |
| 3152-1          | n/a           | C1727T            | I280=  |
| 721-1           | <i>sus3-4</i> | G1956A            | D326N  |
| 1401-1          | <i>sus3-3</i> | G2140A            | V342M  |
| 3154-1          | <i>sus3-1</i> | G2244A            | W376*  |
| 406-1           | n/a           | C2322T            | INTRON |
| 317-5           | n/a           | C2505T            | INTRON |

**Table S4.** *Lotus japonicus* *SUS4* alleles and their sequence differences compared with the wild type

| SL Plant Number   | Allele number | Nucleotide change | Effect |
|-------------------|---------------|-------------------|--------|
| 398-1             | n/a           | A2570G            | INTRON |
| 4801-1            | n/a           | C2625T            | INTRON |
| 4671-1/<br>4864-1 | <i>sus4-1</i> | C2762T            | P366S  |
| 1162-1            | <i>sus4-2</i> | G3044A            | G434R  |
| 3274-1            | <i>sus4-3</i> | G3377A            | G509E  |
